# Supplementary material for: Advanced Glycation End Products Induce Endothelial-to-Mesenchymal Transition via Downregulating Sirt 1 and Upregulating TGF-βin Human Endothelial Cells
Source: Hindawi journal article supplement (doi:10.1155/2015/684242), 2015-01-01
Supplement: f1 [file 684242.f1.pdf]

Supplemental Figure 1. Regulation on Sirt 1 expression by TGF- $\beta$

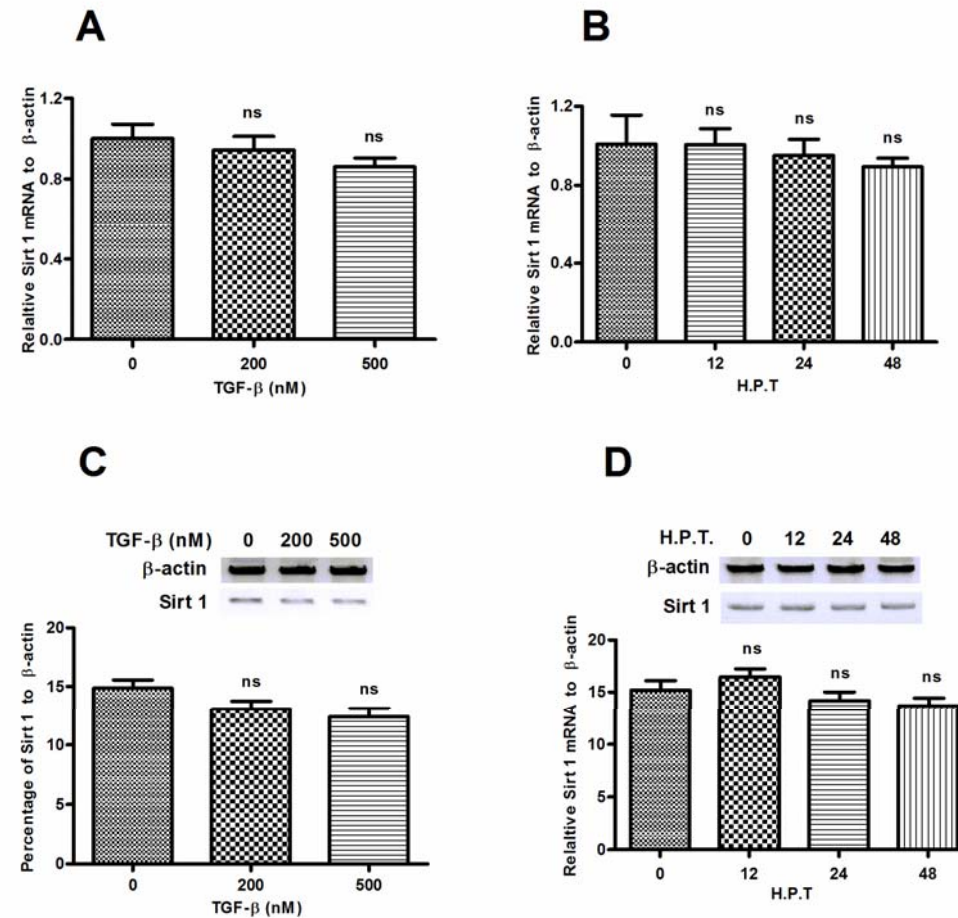

A and B: Regulation on Sirt 1 expression in mRNA level by TGF- $\beta$  treatment with various dose (A) OR with 500 nM for the inoculation for various hours (B); C and D: Regulation on Sirt 1 expression protein level by TGF- $\beta$  treatment with various dose (C) OR with 500 nM for the inoculation for various hours (D).
